# Supplementary material
Source: MDPI journal article supplement (https://www.mdpi.com/2227-9040/11/4/205)
Supplement: s1 [file s1]

**Supplementary Material for**

**A Facile Synthetic Approach Toward Obtaining N-doped Carbon Quantum Dots from Citric Acid and Amino Acids, and Their Application in Selective Detection of Fe(III) Ions**

*Silvoja Šafranko*<sup>1</sup>, *Kristina Janđel*<sup>2</sup>, *Monika Kovačević*<sup>2</sup>, *Anamarija Stanković*<sup>2</sup>, *Maja Dutour Sikirić*<sup>3</sup>,  
*Šimun Mandić*<sup>4</sup>, *Aleksandar Széchenyi*<sup>5</sup>, *Ljubica Glavaš Obrovac*<sup>6</sup>, *Marijana Leventić*<sup>6</sup>, *Ivica Strelec*<sup>1</sup>,  
*Krunoslav Aladić*<sup>1</sup>, *Stela Jokić*<sup>1\*</sup>

<sup>1</sup> Faculty of Food Technology Osijek, University of Osijek, Franje Kuhača 18, 31000 Osijek, Croatia

<sup>2</sup> Department of Chemistry, University of Osijek, Ulica cara Hadrijana 8/A, 31000 Osijek, Croatia

<sup>3</sup> Division of Physical Chemistry, Ruđer Bošković Institute, 10000 Zagreb, Croatia

<sup>4</sup> Center of Excellence for Advanced Materials and Sensing Devices, Institute of Physics, Bijenička Cesta 46, 10000 Zagreb, Croatia

<sup>5</sup> Institute of Pharmaceutical Technology and Biopharmacy, Faculty of Pharmacy, University of Pécs, H-7624 Pécs, Hungary

<sup>6</sup> Department of Medical Chemistry, Biochemistry and Clinical Chemistry, University of Osijek, J. Huttlera 4, 31000 Osijek, Croatia

\* e-mail: stela.jokic@ptfos.hr

## Content of listed material

**Figure S1.** Integrated fluorescence intensity vs. absorbance of CQDs samples (recorded at  $\lambda_{\text{EX}}=360$  nm); calculated quantum yields (QY) of synthesized samples of CQDs using quinine sulfate as reference standard ( $\phi_{\text{QS}} = 54\%$ ).

**Figure S2.** TEM images of CQD@Leu; inset: size distribution diagram and HR-TEM image of CQD@Leu

**Figure S3.** TEM image of CQD@Leu showing amorphous structure of CQDs.

**Figure S4.** The proposed energy-level diagrams for (A) CQD@Blank and (B) CQD@Leu.

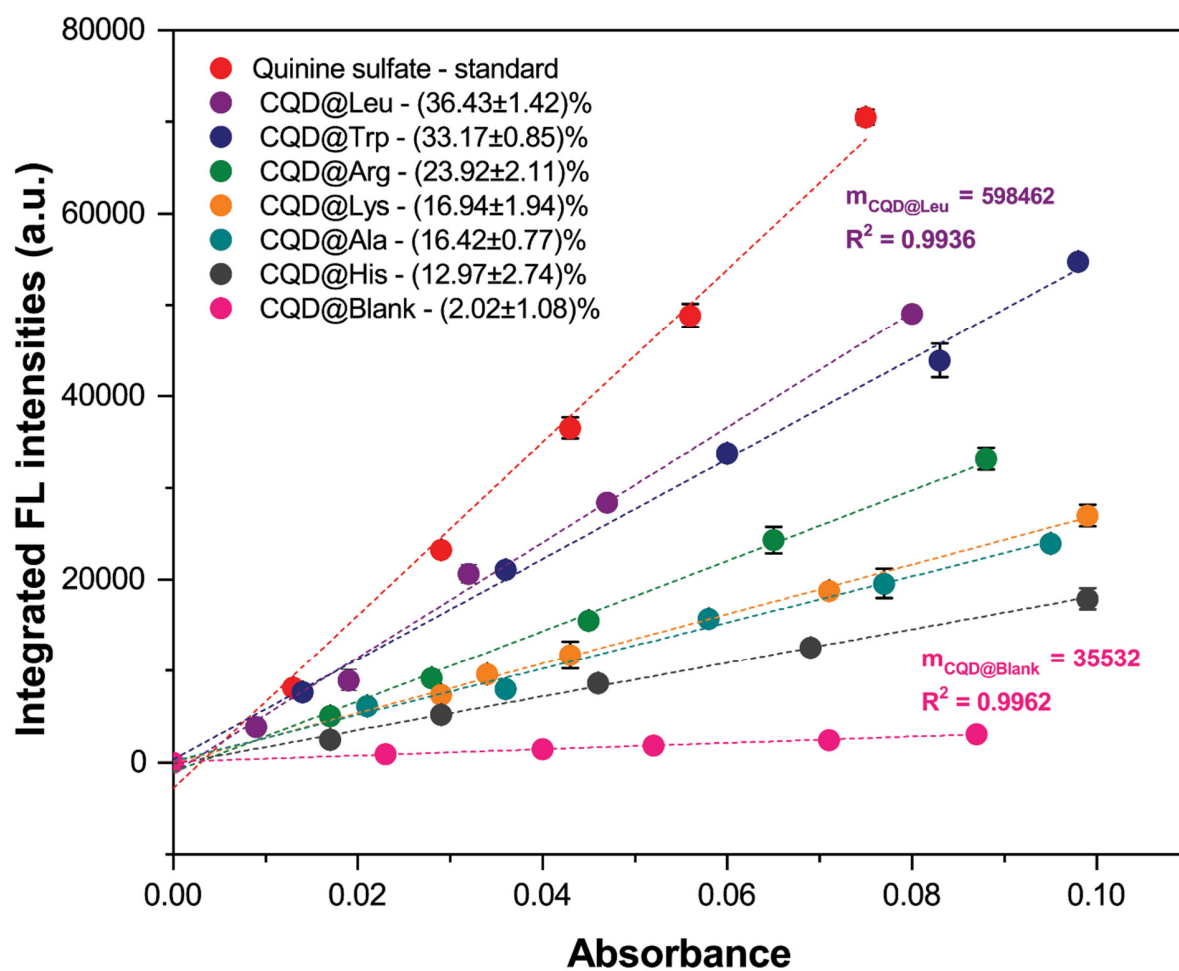

Figure S1

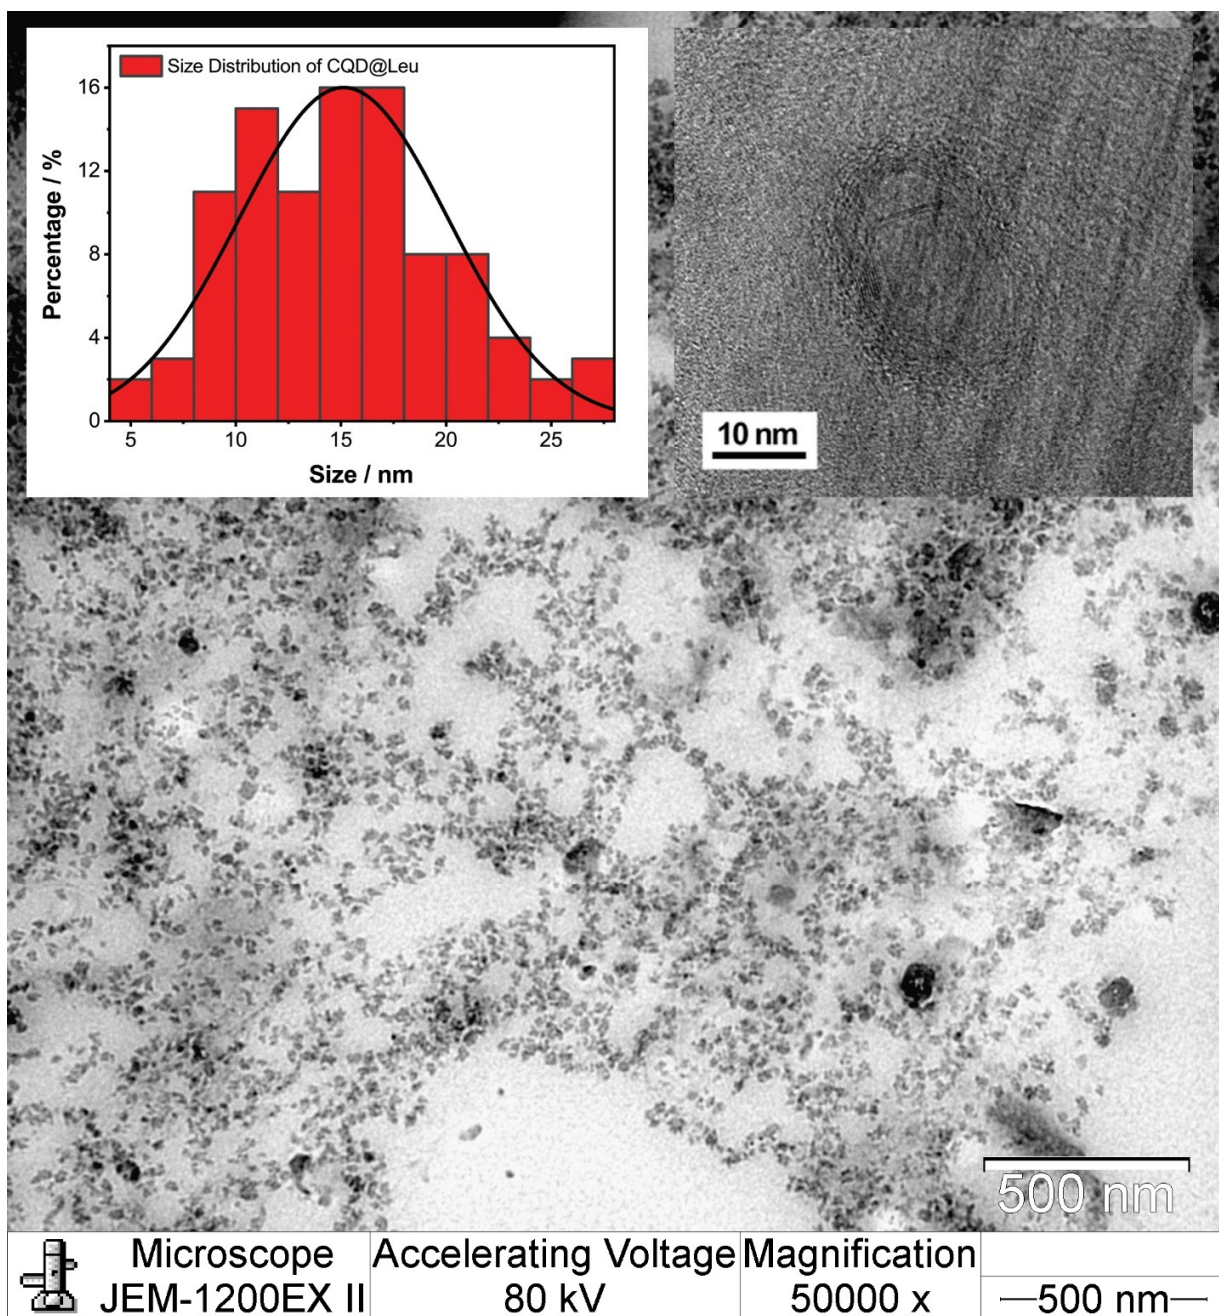

Figure S2

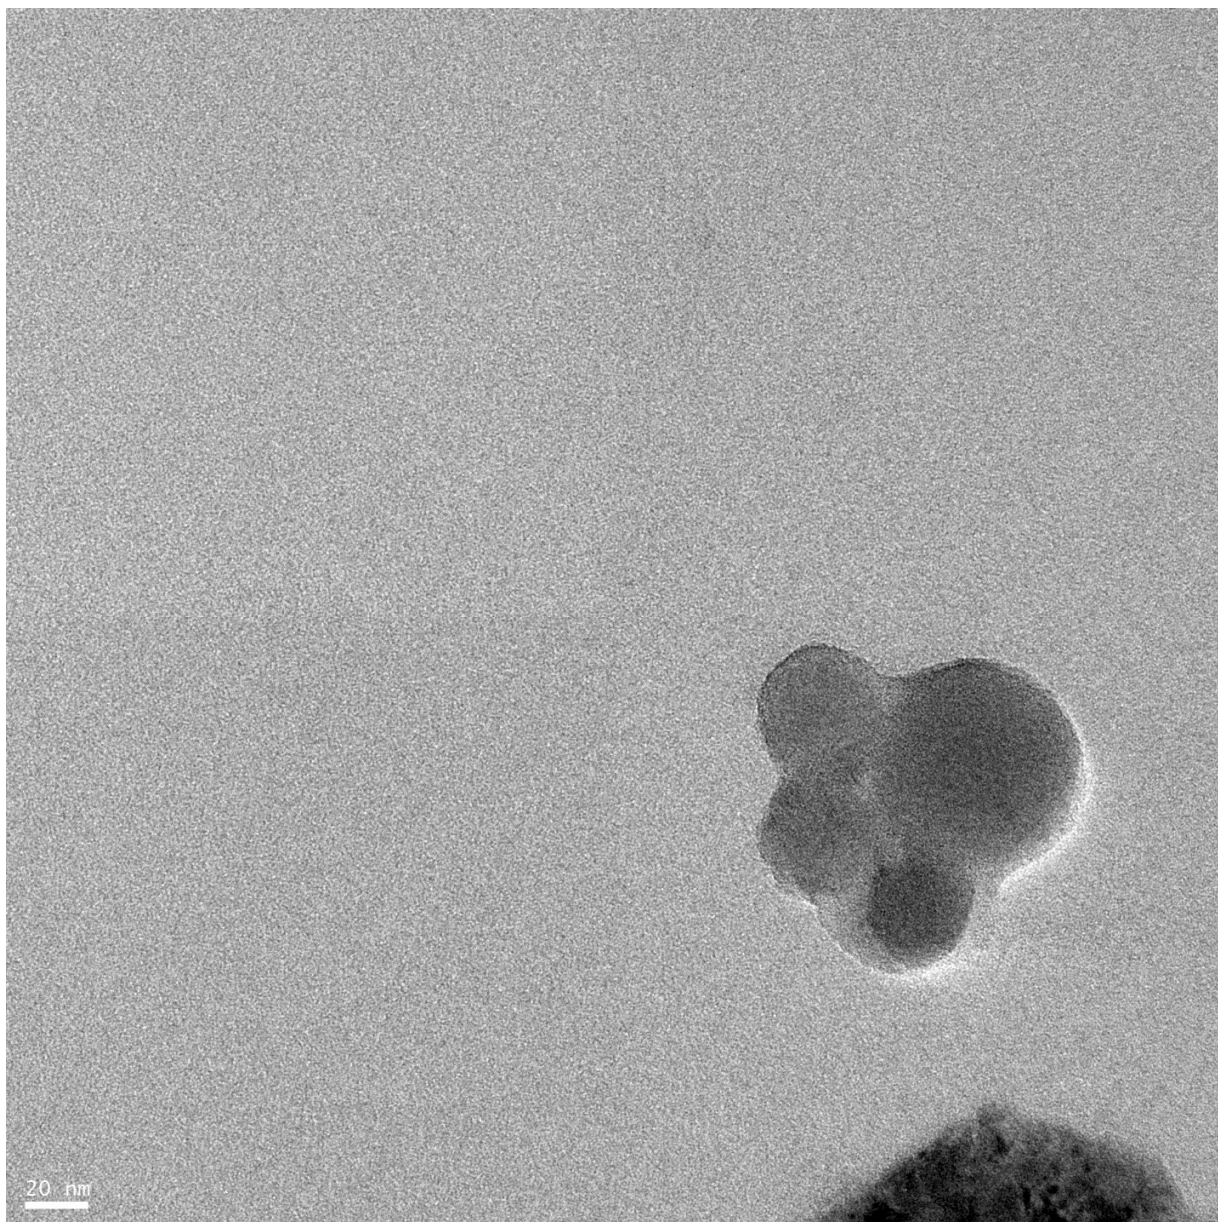

**Figure S3**

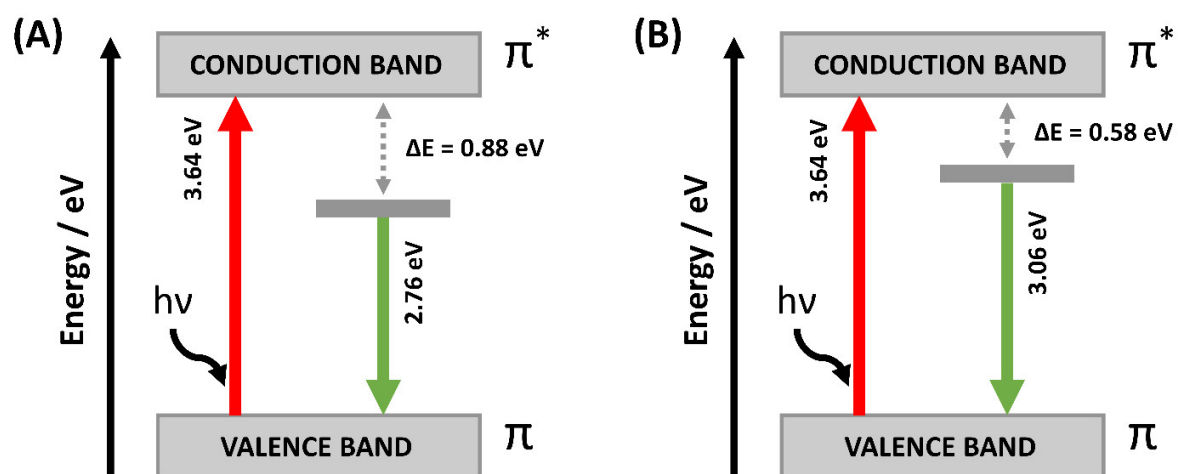

Figure S4
